# Supplementary material for: Design and synthesis of few-layer molybdenum oxide selenide encapsulated in a 3D interconnected nitrogen-doped carbon anode toward high-performance sodium storage
Source: Royal Society of Chemistry journal article supplement (doi:10.1039/d4nj00389f), 2024-01-01
Supplement: d4nj00389f1.pdf [file d4nj00389f1.pdf]

## Supporting Information

**Design and synthesis Few-layer Molybdenum Oxide Selenide Encapsulated in 3D interconnected nitrogen-doped carbon Anode Toward High-Performance sodium storage**

Yonghong Qin<sup>1, 2</sup>, Shahrman Zainal Abidin<sup>1\*</sup>, Azhari Bin Md Hashim<sup>1</sup>, Oskar Hasdinor Hassan<sup>1</sup>, and Xiaojun Zhao<sup>3\*</sup>

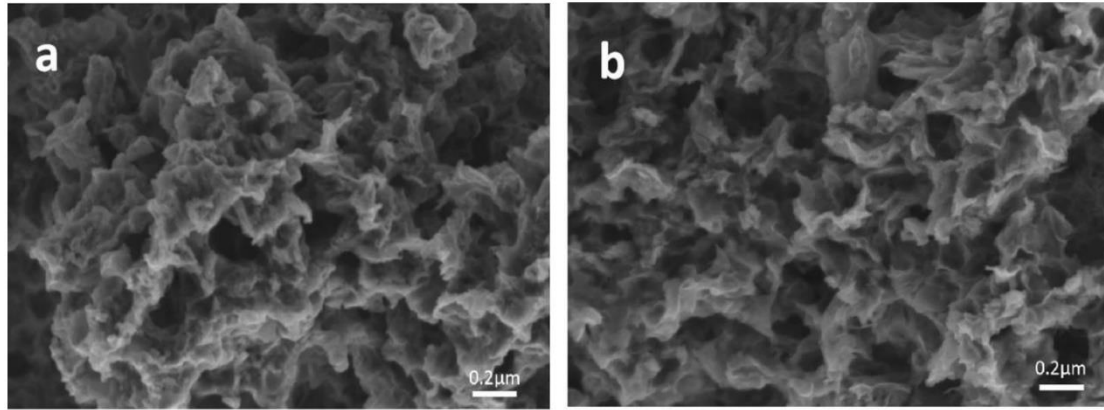

**Fig. S1** SEM images of (a) MoO<sub>3</sub>-NC and (b) MoSe<sub>2</sub>-NC.

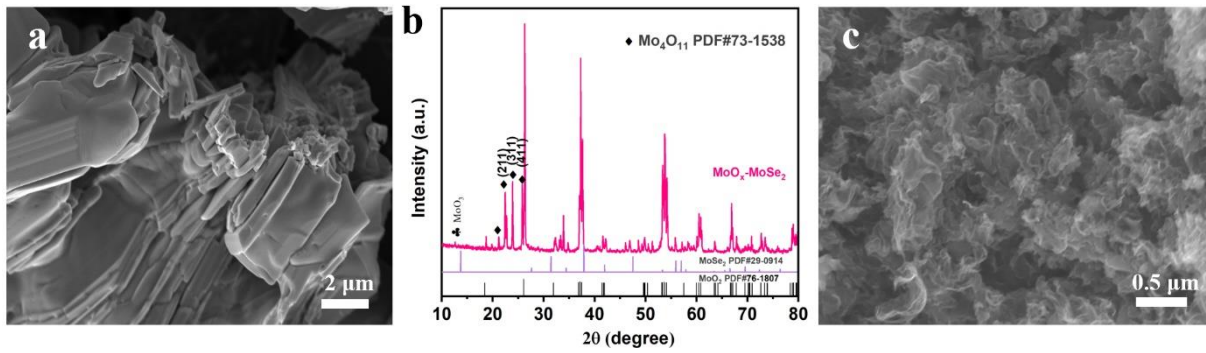

**Fig. S2** SEM images of (a) MoO<sub>x</sub>-MoSe<sub>2</sub> and (b) NC.

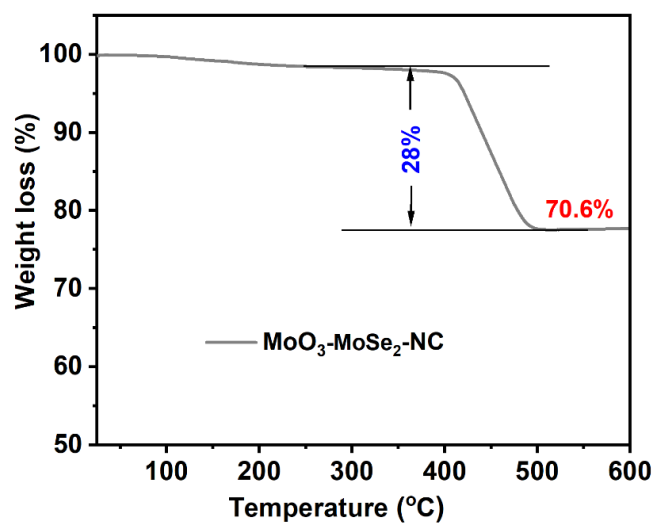

**Fig. S3** TGA curves of MoO<sub>3</sub>-MoSe<sub>2</sub>-NC.

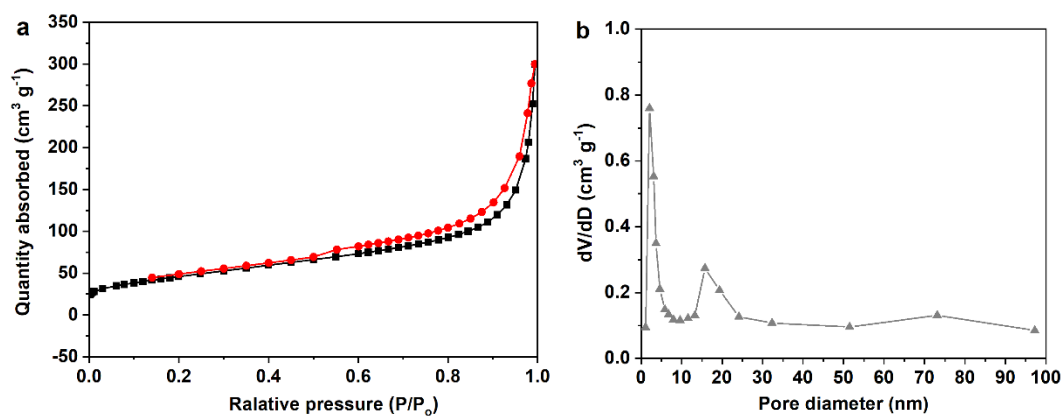

**Fig. S4** (a) N<sub>2</sub> adsorption-desorption isotherms and (b) the pore-size distribution plot of the TGA curves of MoO<sub>3</sub>-MoSe<sub>2</sub>-NC.

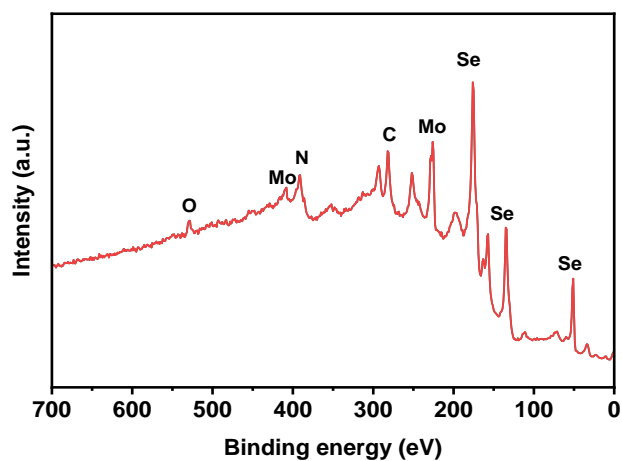

**Fig. S5** XPS survey of MoO<sub>3</sub>-MoSe<sub>2</sub>-NC.

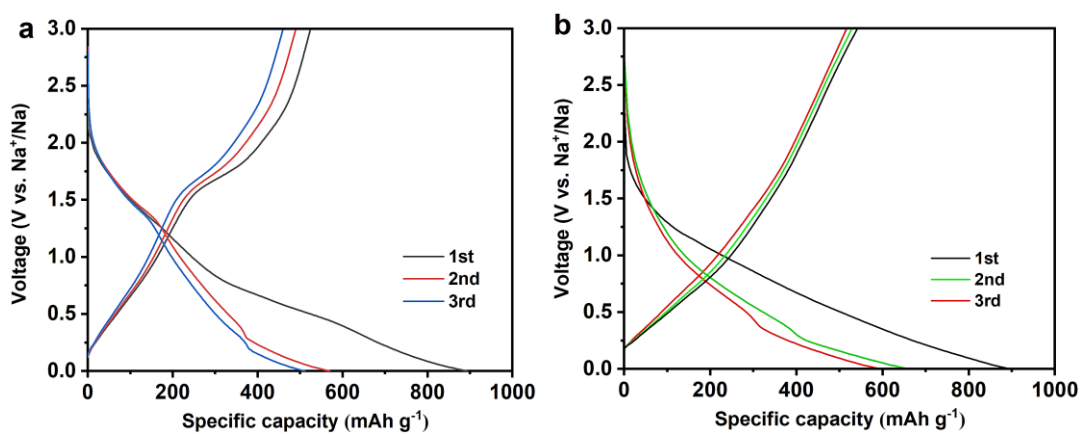

**Fig. S6** Galvanostatic discharge/charge curves of (a) MoSe<sub>2</sub>-NC and (b) MoO<sub>3</sub>-NC, respectively.

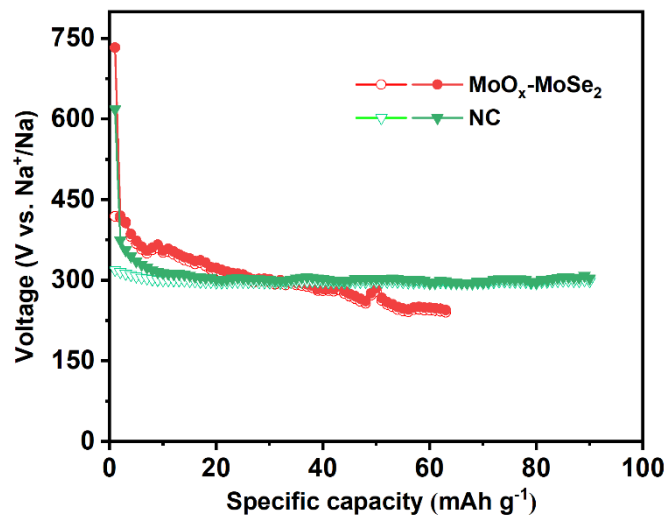

**Fig. S7** Cycle performance of MoO<sub>x</sub>-MoSe<sub>2</sub> and NC at 0.1 A g<sup>-1</sup>.

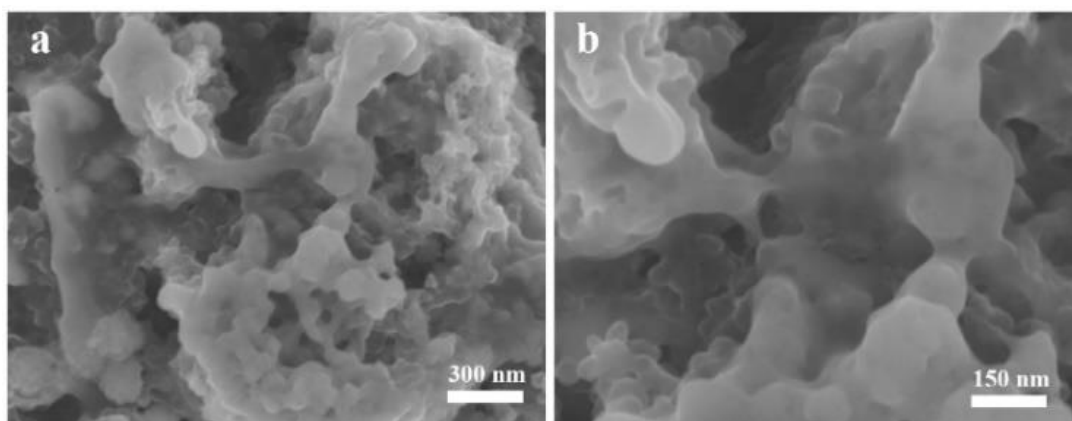

**Fig. S8** (a, b) SEM images of MoO<sub>3</sub>-MoSe<sub>2</sub>-NC sample after 100 cycles for SIBs.

**Table S1** Performance comparison between MoO<sub>3</sub>-MoSe<sub>2</sub>-NC anode and the reported anode materials for SIBs

| Samples                                       | Cycle performance (mAh g <sup>-1</sup> )/number | Current density (A g <sup>-1</sup> ) | Ref.                                                         |
|-----------------------------------------------|-------------------------------------------------|--------------------------------------|--------------------------------------------------------------|
| MoO <sub>3</sub> -MoSe <sub>2</sub> -NC       | 551/150<br>368/600                              | 0.1<br>1                             | This work                                                    |
| MoO <sub>2</sub> /MoSe <sub>2</sub> -graphene | 404 (rate capability)<br>340/300                | 0.1<br>0.5                           | <i>Energy Storage Materials</i> , 2018, 12, 241-251          |
| MoSe <sub>2</sub> nanoparticles               | 374/100                                         | 0.5                                  | <i>J. Alloys. Compds.</i> 2022, 922, 166306                  |
| MoSe <sub>2</sub> @C HNS                      | 458/200                                         | 0.5                                  | <i>Inorg. Chem. Front.</i> , 2020, 7, 1691-1698              |
| MoSe <sub>2</sub> @NPC/rGO                    | 340/500                                         | 0.5                                  | <i>J. Power Sources</i> , 2020, 476, 228660                  |
| TiO <sub>2</sub> @MoO <sub>2</sub> -C         | 210/500                                         | 1                                    | <i>Adv. Energy Mater.</i> 2017, 7(15), 1602880               |
| MoO <sub>2</sub> /MoSe <sub>2</sub> @NPC      | 382/200                                         | 0.1                                  | <i>ACS Appl. Mater. Interfaces</i> 2022, 14, 32, 36592–36601 |

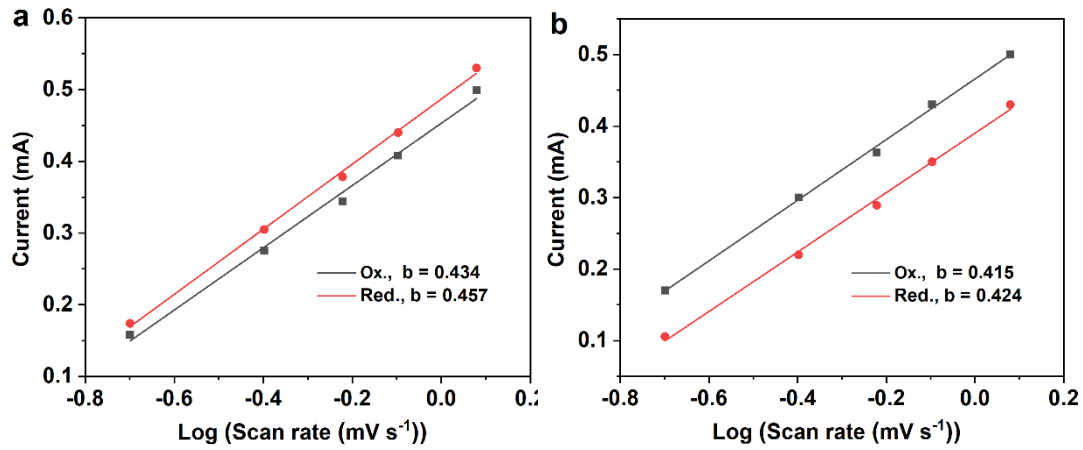

**Fig. S9** Linear relation between  $I_p$  and  $v^{1/2}$  of the (a) MoO<sub>3</sub>-MoSe<sub>2</sub>-NC and (b) MoSe<sub>2</sub>-NC anodes for SIBs, respectively.

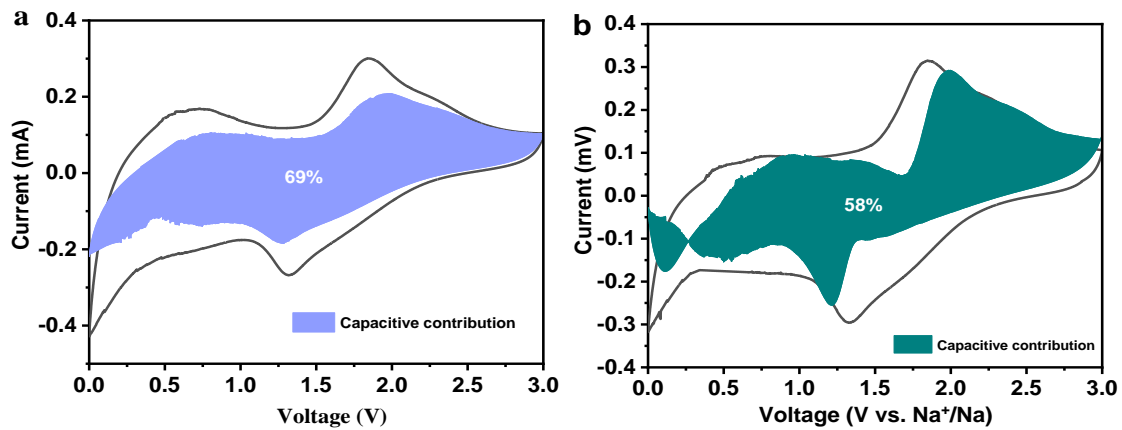

**Fig. S10** Separation of the capacitive and diffusion currents at a scan rate of  $0.6 \text{ mV s}^{-1}$  of the (a) MoO<sub>3</sub>-MoSe<sub>2</sub>-NC and (b) MoSe<sub>2</sub>-NC anodes for SIBs, respectively.

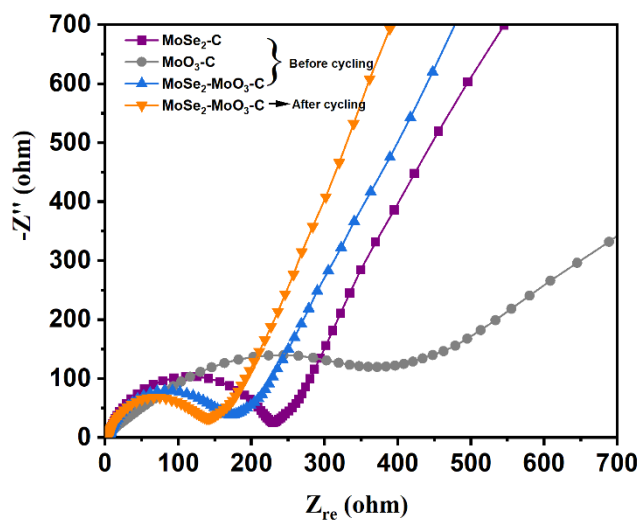

**Fig. S11** Nyquist plots of MoO<sub>3</sub>-MoSe<sub>2</sub>-NC, MoSe<sub>2</sub>-NC, and MoO<sub>3</sub>-NC anodes before and after cycling.
